# Supplementary material for: Disruption of a potential disulfide bond of Cys65–Cys141 on the structure and stability of globin X from zebrafish
Source: Royal Society of Chemistry journal article supplement (doi:10.1039/d4cp04253k), 2025-01-01
Supplement: d4cp04253k1.pdf [file d4cp04253k1.pdf]

Supplementary Information for

**Disruption of a potential disulfide bond of Cys65-Cys141 on  
the structure and stability of globin X from zebrafish**

Aiqun Pan <sup>a</sup>, Xichun Liu <sup>a\*</sup>, Hui Han <sup>a</sup>, Shu-Qin Gao <sup>b</sup>, Ying-Wu Lin <sup>a,b\*</sup>

<sup>a</sup> School of Chemistry and Chemical Engineering, University of South China, Hengyang 421001, China.

<sup>b</sup> Key Lab of Protein Structure and Function of Universities in Hunan Province, University of South China, Hengyang 421001, China.

**Corresponding authors:** \*

*E-mail:* [ywlin@usc.edu.cn](mailto:ywlin@usc.edu.cn) (Y.-W. Lin); [njlx1901@163.com](mailto:njlx1901@163.com) (X. Liu)

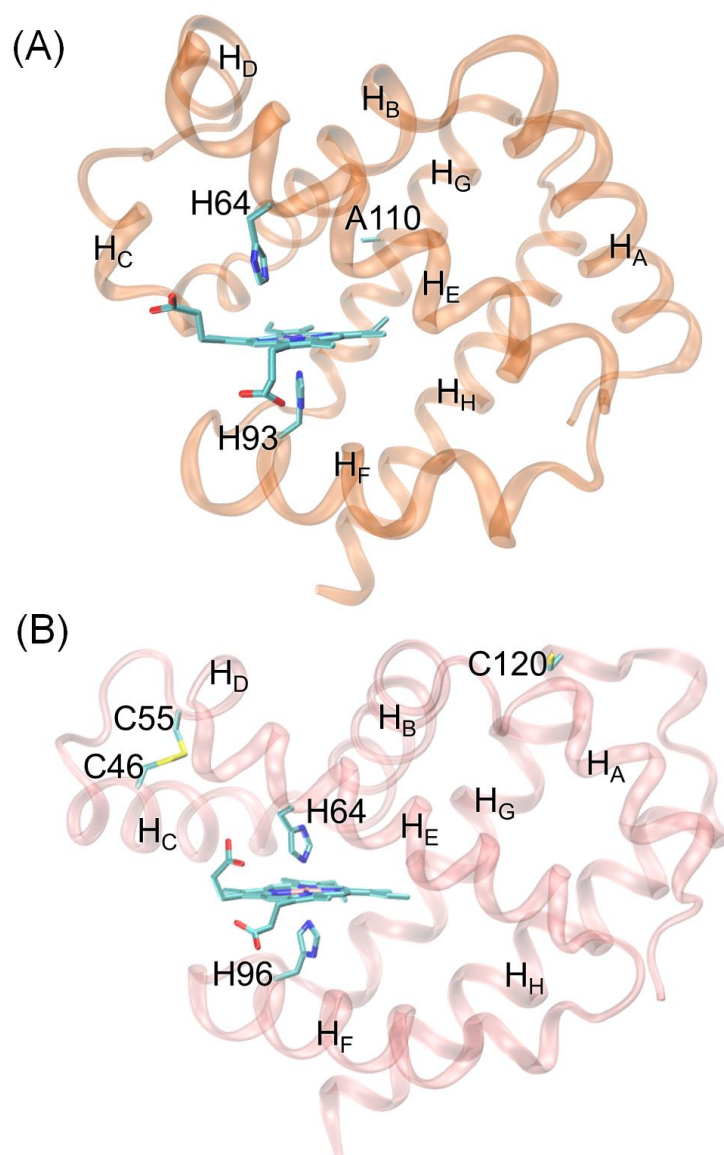

**Figure S1.** (A) X-ray crystal structure of human K45R/C110A Mb mutant (PDB code 3RGK), showing the heme site and the location of Ala110. (B) X-ray crystal structure of human Ngb (PDB code 4MPM), showing the bis-His heme coordination, the disulfide bond of Cys46-Cys55 and the location of Cys120. The polypeptide chain with eight  $\alpha$ -helices is labeled as A-H.

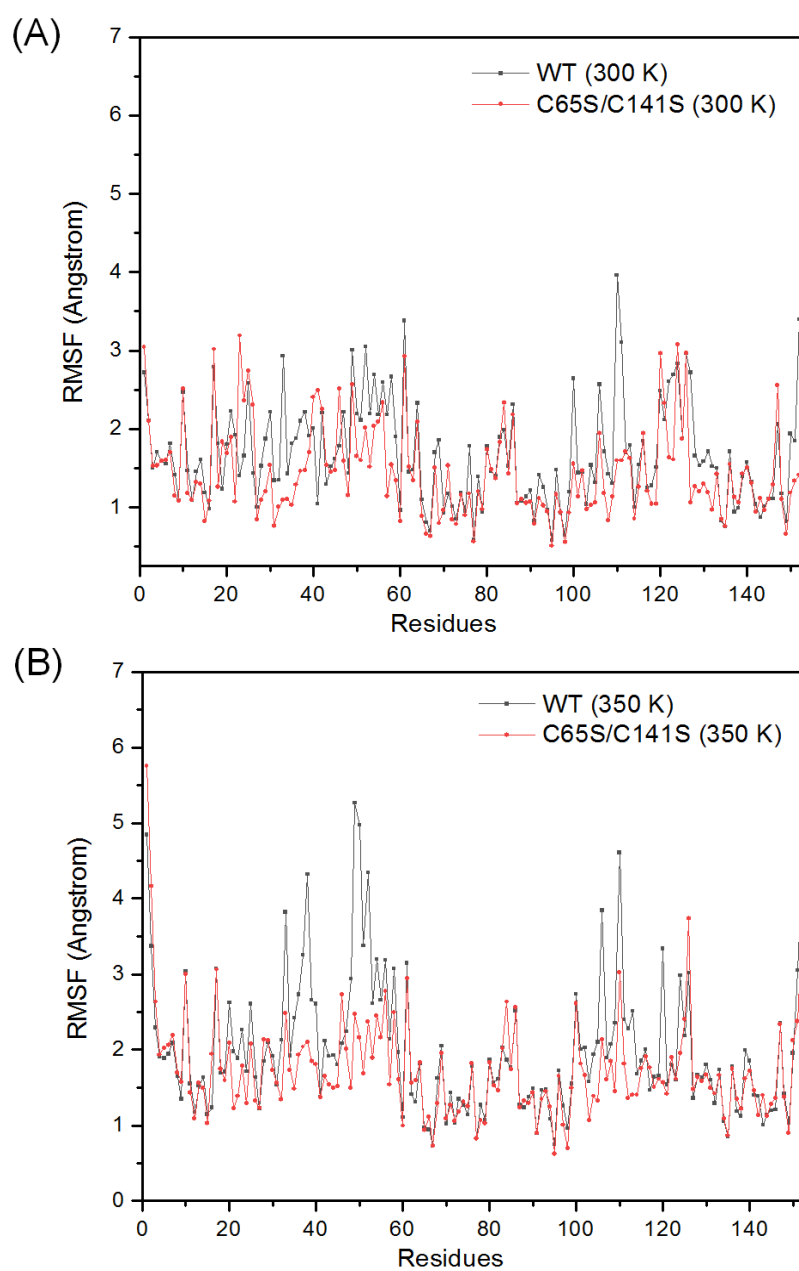

**Figure S2.** The average RMSF over time of each residue in the trajectories between 100-200 ns for WT and C65S/C141S globin X simulated at 300 K (A) and 350 K (B), respectively.

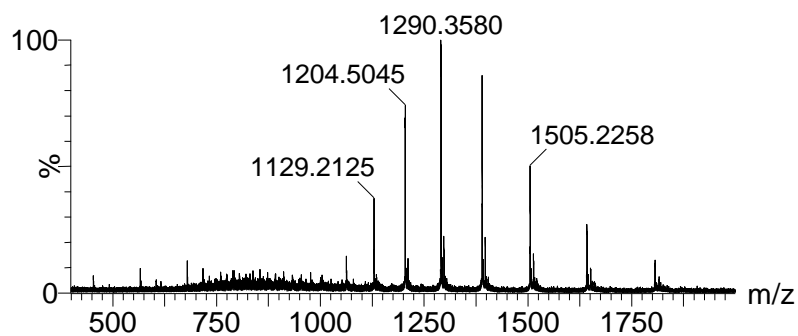

**Figure S3.** ESI-MS spectra of WT globin X showing the original multiply-charged series.

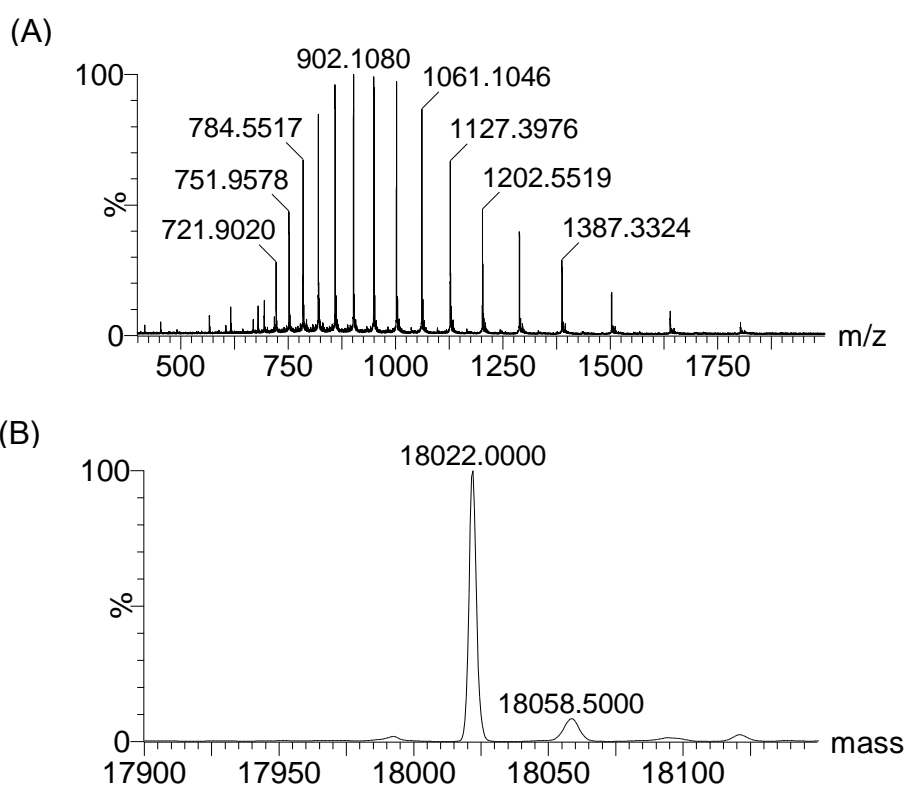

**Figure S4.** (A) ESI-MS spectra of the purified C65S/C141S globin X showing the corresponding multi-charged peaks. (B) The molecular weight of C65S/C141S globin X was calculated to 18021.80 Da, observed at 18022.00 Da.

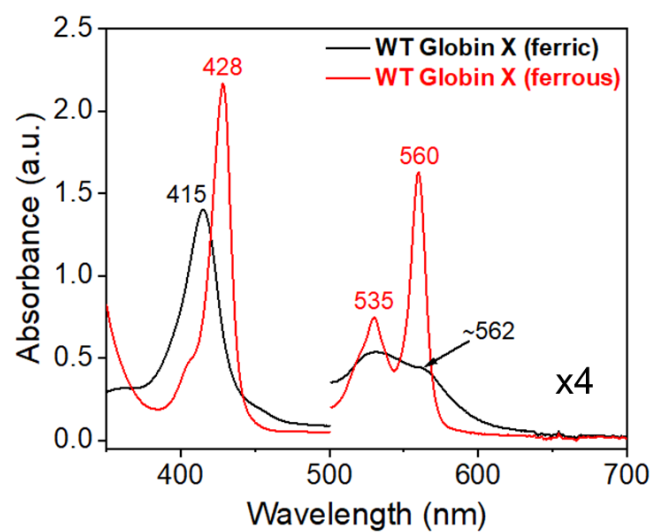

**Figure S5.** UV-Vis spectra of WT globin X in both ferric and ferrous states.

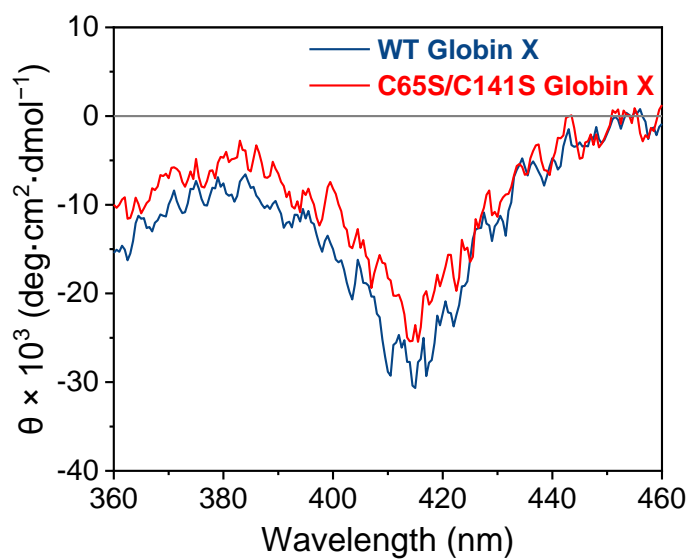

**Figure S6.** CD spectra of WT globin X (blue) and C65S/C117S globin X (red) (10  $\mu$ M protein in 10 mM potassium phosphate buffer, pH 7.4).
